# 1 The giant staphylococcal protein Embp facilitates colonization of 2 surfaces through Velcro-like attachment to fibrillated fibronectin 3

4 Nasar Khan<sup>1†</sup>, Hüsnu Aslan<sup>1‡</sup>, Henning Büttner<sup>2</sup>, Holger Rohde<sup>2</sup>, Thaddeus Wayne Golbek<sup>3</sup>, Steven  
5 Joop Roeters<sup>3,4</sup>, Sander Woutersen<sup>4</sup>, Tobias Weidner<sup>3</sup>, and Rikke Louise Meyer<sup>1,5\*</sup>

6 1: Interdisciplinary Nanoscience Center (iNANO), Aarhus University, 8000 Aarhus, Denmark.

7 2: Institute for Medical Microbiology, Virology and Hygiene, University Medical Centre Hamburg-  
8 Eppendorf, 20246 Hamburg, Germany.

9 3: Department of Chemistry, Aarhus University, 8000 Aarhus C, Denmark.

10 4: Van 't Hoff Institute of Molecular Sciences, University of Amsterdam, 1098XH, Amsterdam, the  
11 Netherlands.

12 5: Department of Biology, Aarhus University, 8000 Aarhus C, Denmark.

13 † These authors contributed equally to this work.

14 ‡ Current affiliation: DFM – Danish National Metrology Institute, Kogle Alle 5, 2970 Hoersholm,  
15 Denmark

16 \* Corresponding author: rikke.meyer@inano.au.dk

17

18

## 19 Abstract

20

21 *Staphylococcus epidermidis* causes some of the most hard-to-treat clinical infections by  
22 forming biofilms: Multicellular communities of bacteria encased in a protective matrix, supporting  
23 immune evasion and tolerance against antibiotics. Biofilms occur most commonly on medical  
24 implants, and a key event in implant colonization is the robust adherence to the surface, facilitated by  
25 interactions between bacterial surface proteins and host matrix components. *S. epidermidis* is  
26 equipped with a giant adhesive protein, Embp, which facilitates bacterial interactions with surface-  
27 deposited, but not soluble fibronectin. The structural basis behind this selective binding process has  
28 remained obscure. Using a suite of single-cell and single-molecule analysis techniques, we show that  
29 *S. epidermidis* is capable of such distinction because Embp binds specifically to fibrillated fibronectin  
30 on surfaces, while ignoring globular fibronectin in solution. *S. epidermidis* adherence is critically  
31 dependent on multi-valent interactions involving 50 fibronectin-binding repeats of Embp. This  
32 unusual, Velcro-like interaction proved critical for colonization of surfaces under high flow, making  
33 this newly identified attachment mechanism particularly relevant for colonization of intravascular  
34 devices, such as prosthetic heart valves or vascular grafts. Other biofilm-forming pathogens, such as  
35 *Staphylococcus aureus*, express homologs of Embp and likely deploy the same mechanism for surface  
36 colonization. Our results may open for a novel direction in efforts to combat devastating, biofilm-  
37 associated infections, as the development of implant materials that steer the conformation of adsorbed  
38 proteins is a much more manageable task than avoiding protein adsorption altogether.

39

## 40 INTRODUCTION

41 Biomedical implants, such as catheters, prosthetics, vascular grafts, and similar devices have  
42 revolutionized the medical field. However, implants can lead to severe infections due to bacterial  
43 biofilms: The formation of multicellular bacterial communities encased in a protective extracellular  
44 matrix (1). Bacteria in the biofilm evade phagocytosis by immune cells (2), and the immune system  
45 can therefore not eradicate the infection. Furthermore, a fraction of the cells enter a dormant state in  
46 which they are highly tolerant to antibiotics (3). With the rise in use of biomedical implants, there is  
47 an urgent and growing need to understand how biofilm infections arise, such that new strategies for  
48 preventative treatment can be developed.

49 Staphylococci, particularly *Staphylococcus aureus* and *Staphylococcus epidermidis* are the  
50 culprits of most implant-associated infections (4). Despite its low virulence, *S. epidermidis* is  
51 common in these infections due to its prowess in biofilm formation. *S. epidermidis* attaches to  
52 implant surfaces via adsorbed host proteins (5, 6) and it expresses an array of surface-bound proteins  
53 (adhesins) that bind to host proteins, such as fibrin, fibronectin, vitronectin, and collagen to initiate  
54 biofilm formation (7). One such adhesin is the extracellular matrix binding protein (Embp), which is  
55 found in the vast majority of clinical isolates of *S. epidermidis* (8, 9), suggesting that this giant 1 MDa  
56 protein is important for this species' pathogenicity. Embp contains a number of repetitive motifs.  
57 These were originally described based on sequence similarity to be 21 "Found in Various  
58 Architecture" (FIVAR) repeats and 38 alternating repeats of "G related Albumin Binding" (GA) and  
59 FIVAR repeats combined, named FIVAR-GA repeats. After the crystal structure was recently solved,  
60 the domain structure was updated and consists of 10 170-aa F-repeats that each represent two FIVAR  
61 repeats, and 40 125-aa FG-repeats that each represent the previously termed FIVAR-GA repeats (10).  
62 These 50 repeats can bind to fibronectin (Fn), and it is presumed that this interaction aids the  
63 colonization of the host (11).

64 The Fn deposition can occur around implants (12) and offers a site for bacterial attachment.  
65 We wondered how bacteria like *S. epidermidis* can colonize implant surfaces by interacting with  
66 adsorbed Fn when the same protein is also abundant in a soluble form in blood. Presumably, Fn-  
67 binding proteins on the bacterial cell surface become occupied with soluble Fn before being able to  
68 interact with Fn on the implant surface. The aim of this study was to determine how pathogens  
69 overcome this dilemma and bind to host proteins on tissue or implant surfaces while ignoring soluble  
70 forms of the same protein. Understanding the pathogens' ability to selectively colonize implant  
71 surfaces reveals conceptual mechanisms for how pathogens control their location and fate in the host.

72 In this study, we investigate Embp's interaction with Fn. Fn circulates in bodily fluids in a  
73 compact globular form (13), while fibrillated Fn contributes to the assembly of the extracellular  
74 matrix of tissue (14). It is the stretching of Fn upon interacting with cell surface integrins, which  
75 exposes self-binding domains and trigger Fn fibrillation. This mechanism ensures that Fn only  
76 fibrillates in the extracellular matrix of tissue and not in the blood stream (15). We hypothesize that  
77 *S. epidermidis* interacts selectively with fibrillated Fn, and that a fibrillated ligand provides an  
78 opportunity for a multi-valent interaction with the many repetitive F and FG repeats of the Embp.  
79 Using a model system of polymer-coated surfaces that facilitate Fn adsorption in either globular or  
80 fibrillated conformation, we probed Embp's interaction with Fn. Using native and recombinant Embp  
81 in a series of analyses at the population-, single-cell-, and single-molecule levels, we confirmed that  
82 Embp selectively interacts with fibrillated Fn. The interaction is a Velcro-like mechanism where  
83 multiple binding-domains must interact simultaneously to facilitate strong attachment. Such strong  
84 attachment via a single protein is particularly beneficial under high sheer stress, such as in the vascular  
85 system, and it was exactly under these conditions that Embp gave the cells and advantage. Embp  
86 homologs are present in other important pathogens capable of biofilm formation in the vascular  
87 system, and our study reveals a mechanism for how bacteria accomplish this feat.

## 88 RESULTS

### 89 Embp does not interact with soluble fibronectin

90 We hypothesized that Embp selectively binds to fibrillated Fn, which would allow the bacteria to  
91 colonize surfaces via Fn without being blocked by soluble Fn in the bloodstream. To study the  
92 interaction between Embp and Fn, we expressed Embp fusion proteins comprised of either 5 F-repeats  
93 (Embp\_5F) or 9 FG-repeats (Embp\_9FG), each fused to the native export signal and anticipated C-  
94 terminal cell wall anchor region (10), in the surrogate host *Staphylococcus carnosus* TM300, which  
95 has no other mechanisms for attachment to Fn. The full-length Embp is too large to clone into a  
96 surrogate host, and it was therefore not possible to investigate the full-length Embp protein. However,  
97 expression of the two different Embp fragments allowed us to study their interactions individually.  
98 The presence of these fragments on the cell surface was confirmed by immunofluorescence staining  
99 (Figure S1).

100 Neither F- nor FG-repeats facilitated adsorption of soluble fluorescently conjugated Fn to the surface  
101 of *S. carnosus* (Figure S2). The native Embp expressed by *S. epidermidis* did not bind soluble Fn  
102 either (Figure S2), concluding that Embp does not interact with Fn in its soluble, globular  
103 conformation.

104

### 105 Embp interacts exclusively with fibrillated fibronectin

106 In order to further investigate Embp's interaction with Fn in different conformations, we produced a  
107 model system in which Fn was adsorbed to a surface in either the globular or fibrillated conformation.  
108 Previous research had shown that Fn fibrillates when adsorbed on surfaces coated with poly (ethyl  
109 acrylate) (PEA), while it remains globular on poly (methyl acrylate) (PMA) (16-18). The two polymer  
110 coatings have similar physico-chemical properties, but the ethyl side group of PEA provides sufficient  
111 mobility of the adsorbed protein to facilitate fibrillation (19, 20). The presence of polymer coatings  
112 was confirmed by atomic force microscopy (AFM) (Figure S3) and X-ray photoelectron spectroscopy  
113 (XPS) (Figure S4 and S5).

114 Upon adsorption to the polymer coating, Fn  
115 spontaneously organized into a fibrillated  
116 network on PEA while remaining globular  
117 on PMA (Figure 1A, B). In order to ascribe  
118 any differences in adhesion to the  
119 conformation and not the amount of Fn, we  
120 analysed the quantity of protein on the two  
121 surfaces. XPS analysis determined that the  
122 amount of adsorbed protein was similar on  
123 the two polymer surfaces (Figure 1C and D,  
124 Table S1). The XPS survey scan and high-  
125 resolution  $C_{1s}$  XPS plots are shown in Figure  
126 S4 and Figure S5. The conformational  
127 differences of adsorbed Fn on the two  
128 coatings was corroborated by Fourier-  
129 transform infrared (FTIR) spectra, in which  
130 the peak positions indicate that Fn adsorbed  
131 to PMA adopts a mostly antiparallel  $\beta$ -sheet  
132 type secondary structure (21), similar to the  
133 globular, solution-state spectrum, while Fn  
134 on PEA adopts a more extended parallel  $\beta$ -  
135 sheet type structure (Figure 1E, Figure S6  
136 and S7).

137 After validating the model system,  
138 Embp-mediated bacterial attachment to  
139 fibrillated and globular Fn was measured  
140 using a flow-cell system where the number

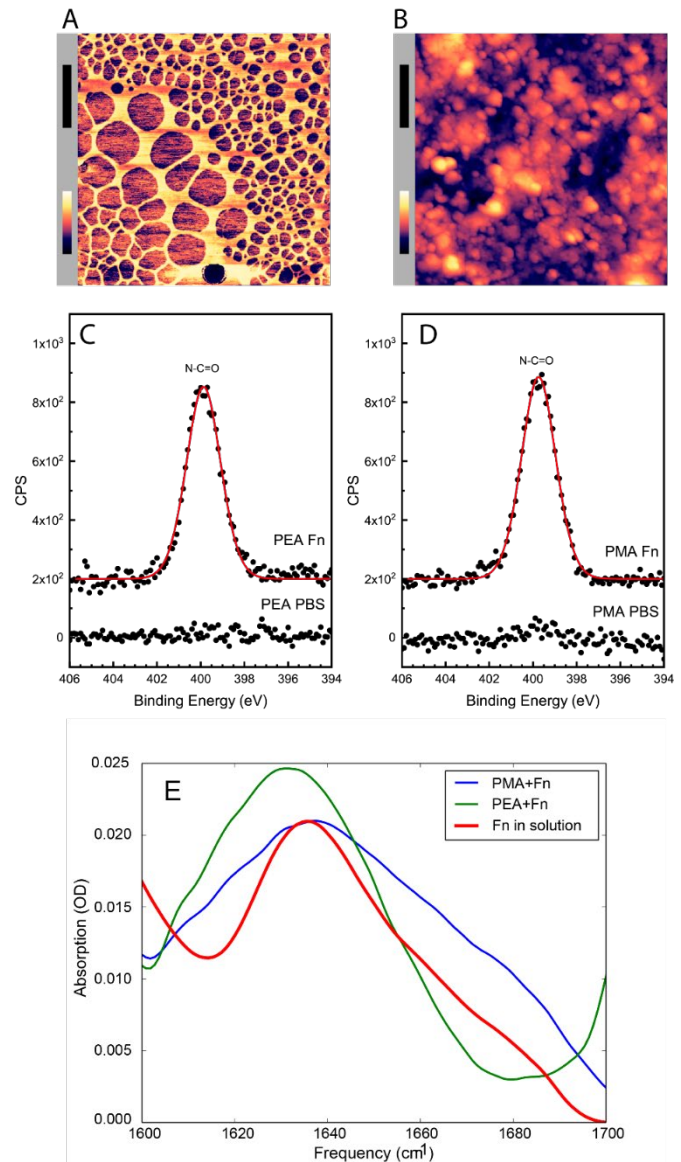

**Figure 1: Adsorbed Fn remains globular on PMA and fibrillates on PEA-coated surfaces.** AFM imaging shows the structure of adsorbed Fn on A) PEA and B) PMA (xy scale bar (black) = 500 nm, height scale bar (color) = 115 nm). XPS analysis of the samples show similar chemical composition of Fn adsorbed to C) PEA and D) PMA, indicating that two polymer surfaces are both covered by Fn. E) FTIR spectral shape and intensity confirms that Fn adsorbed to PMA is similar to Fn in solution.

141 of attached bacteria was counted by microscopy. Very few bacteria attached to the polymer coatings  
142 in the absence of Fn, and only fibrillated Fn stimulated attachment of *S. carnosus* expressing  
143 Embp\_5F or Embp\_9FG, (Figure 2A). Fn consists of two nearly identical subunits linked by a pair  
144 of disulfide bonds at the C terminal (22). Each subunit consists of three domains; F1, F2, and F3 (23).  
145 The globular and compact conformation of Fn is sustained by intramolecular electrostatic interactions  
146 between F1 1<sup>st</sup>-5<sup>th</sup>, F3 2<sup>nd</sup>-3<sup>rd</sup>, and F3 12<sup>th</sup>-14<sup>th</sup> repeat (24, 25). Binding sites in these regions remain  
147 buried in the globular conformation; however, upon fibrillation on a surface or tissue interface, these  
148 binding sites become exposed (26). Since Embp only binds to fibrillated Fn, we hypothesize that it  
149 interacts with epitopes that are buried in the globular conformation, but become exposed when Fn  
150 fibrillates. Indeed, it was previously reported that *S. epidermidis* binds near the C terminal of Fn (27),  
151 and studies of recombinant Fn verified the interaction between Embp and the 12<sup>th</sup> repeat of the F3  
152 domain (11). This repeat may be one of several interaction points and has not been confirmed in full-  
153 length Fn adsorbed in its natural  
154 conformation. To test the interaction  
155 between the 12<sup>th</sup> repeat of the F3 domain and  
156 the Fn-binding F- and FG-repeats, we  
157 repeated cell adhesion analysis on Fn-coated  
158 PEA after blocking the C-terminal heparin-  
159 binding domain II (F3 12<sup>th</sup>-14<sup>th</sup> repeat) with  
160 antibody sc-18827. Control-samples were  
161 blocked with antibody F0916 specific for the  
162 F3 5<sup>th</sup> repeat (Figure 2B). Blocking the F3  
163 12<sup>th</sup>-14<sup>th</sup> repeat decreased the adherence of  
164 *S. carnosus* by approximately 62 % for  
165 Embp\_5F and 64 % for Embp\_9FG (Figure  
166 2B), supporting that Embp interacts with  
167 this subdomain. As the adherence was not  
168 completely abolished by blocking the Fn  
169 binding site, we cannot exclude the  
170 possibility that Embp interacts with other  
171 epitopes in Fn. However, the F3 12<sup>th</sup>-14<sup>th</sup>  
172 repeat is of major significance.

173

## 174 F and FG modules attach to fibronectin

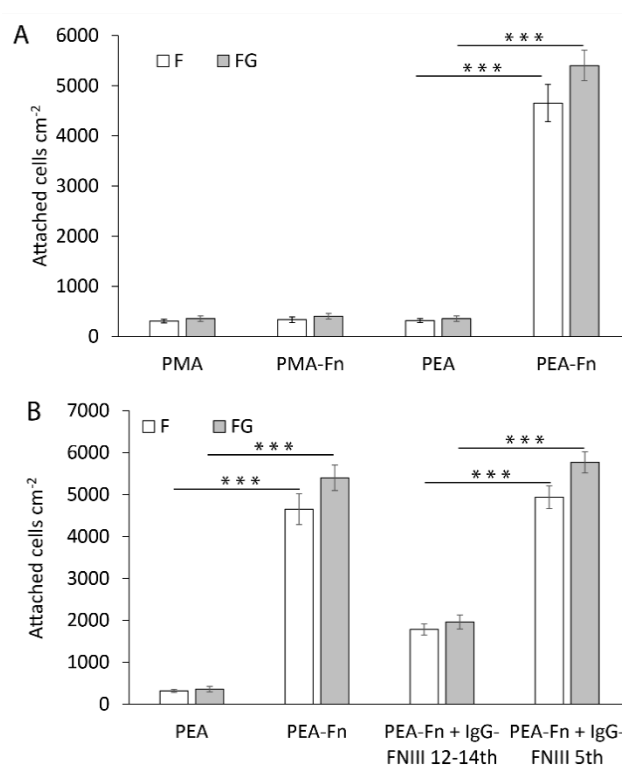

**Figure 2: Embp only mediates bacterial attachment to fibrillated Fn.** A) *S. carnosus* TM300 expressing either F- or FG-repeats were passed through flow cells for 2 hours before enumeration of attached cells by microscopy. Adsorbed Fn only promoted attachment on PEA-coated surfaces where Fn fibrillated. B) Identification of the Fn domain involved in bacterial attachment. The F3 12<sup>th</sup>-14<sup>th</sup> repeats were blocked with a specific antibody prior to exposing bacteria to the surfaces. Blocking of the F3 5<sup>th</sup> domain was included as a control for non-specific blocking of Fn by the antibodies. Values are averages from three independent experiments (error bars = S.D.). The two-tailed P-value from t test is < 0.0001.

175 After learning that Embp interacts exclusively with fibrillated Fn, we probed the strength of  
176 this interaction by single-cell atomic force spectroscopy. Single *S. carnosus* expressing Embp\_5F or  
177 Embp\_9FG were attached to colloidal AFM probes, approached to a Fn-coated PMA or PEA surface  
178 with controlled force, and then retracted to detect the force needed to detach the cell from the  
179 surface. As expected, the force-distance curves obtained from these experiments show that both F  
180 and FG fragments bind to fibrillated but not to  
181 globular Fn. The average maximum adhesion force  
182 between *S. carnosus* and surfaces with fibrillated Fn  
183 was  $1.19 \pm 0.21$  and  $1.16 \pm 0.18$  nN, respectively, for  
184 *S. carnosus* expressing Embp\_5F or Embp\_9FG  
185 (Figure 3). In contrast, the corresponding adhesion  
186 force to surfaces with globular Fn was only  $0.16 \pm$   
187  $0.09$  nN and  $0.12 \pm 0.04$  nN. The adhesion force and  
188 the shape of the force-distance curves reflect multiple  
189 binding events between the cell and the Fn-coated  
190 surface. The multiple binding events could either be  
191 due to multiple Embp fragments on the cell surface  
192 interacting with Fn, or multiple interactions between  
193 a single Embp fragment and Fn.

194

### 195 **Embp binds to fibrillated fibronectin in a Velcro-like manner**

196 Embp contains 50 Fn-binding repeats, and it must be costly for *S. epidermidis* to produce this  
197 enormous 1 MDa protein. How might *S. epidermidis* benefit from the many repetitive binding-  
198 domains? We hypothesize that multivalent interactions can occur if the ligand for this giant adhesin  
199 is fibrillated, resulting in presentation of multiple binding domains in close proximity. Such  
200 multivalent binding would work like Velcro, as many weak binding events result in strong  
201 attachment. Such a Velcro-effect could provide adhesion forces strong enough to attach *S.*  
202 *epidermidis* to Fn via a single Embp protein. To investigate this hypothesis, we expressed and purified  
203 recombinant Embp fragments that contained 1, 4, and 15 repeats of FG- repeats, attached them to an  
204 AFM cantilever using 6His-NTA interaction, and quantified their interaction with Fn by single-

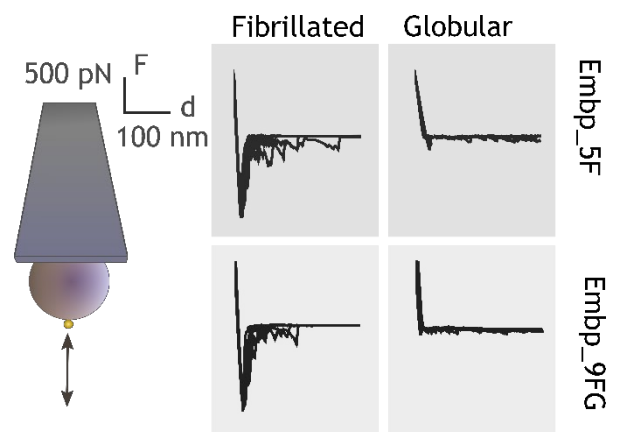

**Figure 3: Single cell force spectroscopy shows that both the F- and FG-repeats adheres strongly to fibrillated Fn.** Single *S. carnosus* cells expressing either F- or FG-repeats were immobilized on a colloidal AFM cantilever, and force-distance curves were measured by approaching and retracting the cantilever to surfaces with fibrillated or globular Fn. Adhesion events are recognized as negative peaks on the force axis below the horizontal baseline.

205 molecule force spectroscopy.  
 206 In agreement with previous  
 207 experiments, the FG-repeat  
 208 did not interact with the  
 209 globular form of Fn (Figure  
 210 4). The interaction force of a 1  
 211 or 4 FG-repeat with fibrillated  
 212 Fn was also insufficient to be  
 213 detected. However, the  
 214 interaction force of 15 FG-  
 215 repeats was  $432 \pm 48$  pN with

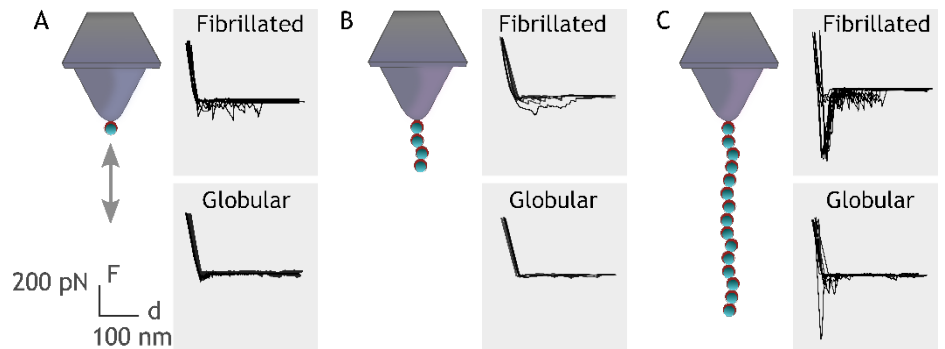

**Figure 4: Single molecule force spectroscopy shows that multiple FG repeats are needed to detect binding to Fn.** Recombinant Embp consisting of either 1 (A), 4 (B) or 15 (C) FG-repeats were tethered to a chemically modified silicon probe trough 6× His-NTA interaction. Force distance curves were measured towards fibrillated Fn on PEA and globular Fn on PMA.

216 fibrillated Fn, confirming the value of multi-domain interaction with the fibrillated ligand (Figure 4).

217

### 218 Embp is necessary for attachment under high flow

219 In our investigating of the interaction mechanism between Embp and Fn, we used fusion proteins that  
 220 contained only a few of the F- or FG-repeats displayed on the surface of *S. carnosus* which has no  
 221 other adhesive proteins. However, *S. epidermidis* has many other cell wall anchored adhesins, and  
 222 the key to understanding Embp's role in *S. epidermidis*' pathogenicity therefore lies in understanding  
 223 the circumstances under which Embp-producing *S. epidermidis* strains have an advantage. If oriented  
 224 perpendicular to the cell surface, Embp could potentially stretch several hundred  $\mu\text{m}$  from the cell  
 225 surface. We measured the hydrodynamic radius of *S. epidermidis* over-expressing Embp, and  
 226 confirmed that it was significantly larger than for *S. epidermidis* lacking Embp ( $2.3 \pm 0.4 \mu\text{m}$  vs  $1.3$   
 227  $\pm 0.2 \mu\text{m}$ , two-tailed t-test,  $n=3$ ,

228  $P < 0.001$ ). We speculated that  
 229 Embp would be more effective  
 230 than other adhesins when *S.*  
 231 *epidermidis* is attaching to Fn  
 232 under high shear stress. We  
 233 therefore compared attachment of  
 234 the two strains at low flow ( $1 \text{ mL min}^{-1}$ ,  $1.8 \text{ dyn cm}^{-2}$ ) and high flow  
 235 ( $18 \text{ mL min}^{-1}$ ,  $31.7 \text{ dyn cm}^{-2}$ ),  
 236 representative of the shear stress  
 237 in arteries. At low flow, Embp did  
 238

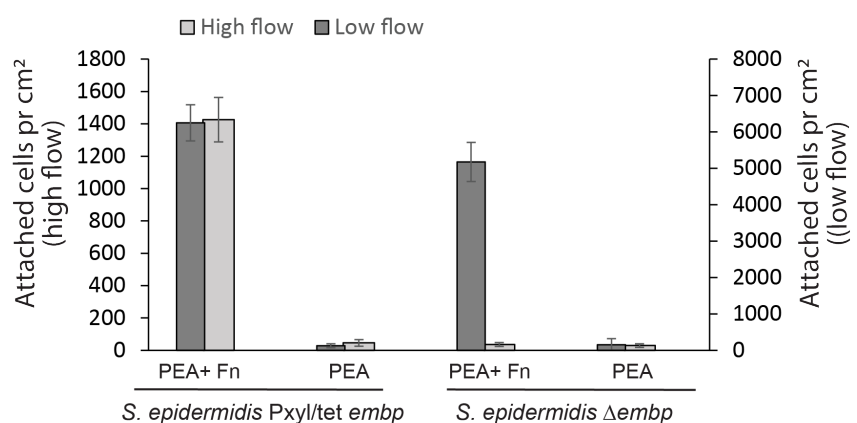

**Figure 5. Embp is required for attachment at high flow.**

Attachment of *S. epidermidis* over-expressing Embp was compared to *S. epidermidis* lacking Embp at two different flow rates. Neither strain attached to PEA, and both strains attached to adsorbed Fn at low flow (dark grey bars). At high flow (light grey bars), only the Embp-expressing strain could attach to the adsorbed Fn.

239 not affect attachment to Fn, but at high flow, attachment was only possible in the strain expressing  
240 Embp (Figure 5).

241

## 242 **DISCUSSION**

243 In this study, we show that the giant cell-surface protein Embp exclusively binds to fibrillated Fn  
244 because the binding site located at F3 12<sup>th</sup> -14<sup>th</sup> repeat is not accessible in the globular, soluble form  
245 of Fn. This discovery has implications for our understanding of how *S. epidermidis* colonizes host  
246 tissue and biomedical implants. Colonization and biofilm formation is the only virulence factor of *S.*  
247 *epidermidis*, and it is therefore imperative to cause disease (28). Implants provide a surface for  
248 attachment and are therefore vulnerable to biofilm infections. The implant surface is immediately  
249 covered by host proteins when it is inserted into the body, and bacterial attachment is assumed to  
250 occur via specific receptor-ligand interactions between adhesins on the bacterial cell and host proteins  
251 adsorbed to the implant surface. The abundance of the same host proteins in solution poses a dilemma:  
252 How can bacteria attach to implant surfaces via proteins that are also available in solution? Based on  
253 previous research (10, 11), we hypothesized that adsorption-induced conformational changes can  
254 affect how accessible a host protein is for bacterial adhesins. In the case of Embp and Fn, the  
255 fibrillation of Fn on the implant surface is decisive for its availability as a ligand for bacterial  
256 attachment. The selective interaction with fibrillated Fn illustrates how biology has solved the need  
257 for interaction with a protein in one location (the extracellular matrix of host tissue) while ignoring  
258 the same protein in another location (the bloodstream).

259 Our results also challenge notion that adsorbed host proteins always assist bacterial colonization.  
260 Motivated by this assumption, much research has been devoted to developing materials or coatings  
261 that prevent protein adsorption altogether. However, our results suggest that biomaterials'  
262 susceptibility to biofilm do not only depend on protein adsorption, but also on the conformation of  
263 adsorbed proteins – a concept that is familiar to cell biologists studying adhesion of mammalian cells,  
264 but not to microbiologists studying bacterial attachment. The role of host protein conformation in  
265 bacterial attachment could explain the conflicting results from *in vitro* studies of how serum proteins  
266 affect attachment of staphylococci. Some studies report increased attachment (11, 29-31), while  
267 others report the opposite (32, 33). Perhaps these discrepancies reflect differences in how the  
268 underlying material affected the conformation of adsorbed serum proteins. Our study investigated  
269 bacterial attachment in a simplified model system with only one host protein, but if the concepts hold  
270 true in serum, it opens a door to controlling bacterial attachment by manipulating the conformation  
271 of adsorbed proteins, which is a much more manageable task than avoiding protein adsorption  
272 entirely.



273 The large number of repetitive domains in Embp and its homologs in *S. aureus* (Ebh) and  
274 *Streptococcus defectivus* (Emb) is unusual among bacterial adhesins, and we wondered how  
275 pathogens benefit from producing such large proteins. One benefit could be that the adhesin protrudes  
276 from the cell surface, which makes it easier to overcome electrostatic repulsion and reach its ligand.  
277 At present, no experimental evidence is available to directly demonstrate the organization of Embp  
278 on the cell surface. However, given the stretched overall architecture revealed by structural analysis  
279 (10), it appears plausible the molecule's length is similar to that of Ebh in *S. aureus*. Ebh is a 1.1  
280 MDa protein with 52 repetitive domains, and its length was predicted to be 320 nm (34). We show  
281 that the hydrodynamic radius of *S. epidermidis* over-expressing Embp was approximately 1  $\mu\text{m}$  larger  
282 than *S. epidermidis* lacking Embp. It is thus likely that Embp extends well beyond the electric double  
283 layer.

284 Another advantage of producing adhesins with repetitive binding domains is the possibility for  
285 multivalent interaction with the ligand. Such multivalency is only possible if the ligand is fibrillated  
286 and thereby presenting many copies of its binding domain in close proximity of each other. Indeed,  
287 we showed that a single FG-module interacts weakly with Fn, while the interaction force of 15 FG-  
288 repeats was  $432 \pm 48$  pN. We therefore propose that the selective interaction with fibrillated Fn is  
289 caused by i) the exposure of an otherwise buried binding domain in the fibrillated protein, and ii) the  
290 possibility of a stronger, multivalent interaction between multiple FG-repeats and the fibrillated  
291 ligand.

292 The typical strength of receptor-ligand bonds is about 20-200 pN (35). Hence, the interaction between  
293 15 FG-repeats and Fn resulted in a very strong bond, and the interaction with full sized Embp is likely  
294 much stronger. The force required to detach Embp from fibrillated Fn will depend on whether all  
295 binding repeats detach at once, or whether detachment can occur from the serial unbinding of the  
296 repeats one by one. This is akin to detachment of Velcro: The attachment is very strong, but  
297 detachment can be obtained by the serial unbinding of individual interactions. The force-distance  
298 curves can provide information about how detachment occurs. On a close inspection, it is clear that  
299 initial retraction events are the strongest and provide the highest adhesion force, indicating that  
300 multiple bonds are broken at the same time (Figure 4B). But we also observe multiple subsequent  
301 perturbations as evidence to serial rupture, unfolding or stretching events. This holds true for  
302 interactions with 15 FG-repeats, but multiple perturbations are also observed for a single FG-repeat.  
303 In this case, the perturbations likely arise from the stretching and ruptures of surface bound  
304 fibronectin yielding an average adhesion force of  $92 \pm 27$  pN, which is around the detection limit for  
305 this setup. Similar results were observed for 4 repeating units with average adhesion force of  $68 \pm 43$   
306 pN. On surfaces with globular Fn, little to no interaction was observed, although 15 repeating units  
307 undergo certain irregular interactions. An explanation for the observed irregularities could be simply

308 the protein's self-occupation/entanglement as would often happen with long polymer chains.  
309 Additionally, as can be seen from Figure 1, the surface distribution of Fn can vary, depending on the  
310 local density. This may be an insignificant problem for the dynamics of cell populations, however,  
311 when it comes to assessing individual cell's or proteins' behavior, the local density can affect the  
312 results.

313 In conclusion, the specific binding domain and repetitive structure of Embp provides an opportunity  
314 for *S. epidermidis* to interact selectively and strongly with fibrillated Fn, using a single adhesive  
315 protein. The open question is how this unique Velcro-like of interaction plays into the pathology of  
316 *S. epidermidis* and other pathogens that contain homologs of this protein in their genome. The genome  
317 of *S. epidermidis* is highly variable, and not all isolates possess the same repertoire of genes for host  
318 colonization and biofilm formation (36). Embp, however, is present in two thirds of *S. epidermidis*  
319 isolates from orthopedic device-related infections (36) and 90 % of isolates from blood stream  
320 infections (9), which indicates some importance for its pathogenicity. Strong attachment via a single  
321 protein could be particularly advantageous in locations where high shear forces make attachment  
322 difficult, such as in the blood stream. Biofilms generally do not form in blood vessels, unless there  
323 is an implant or a lesion on the endothelium. Infections like endocarditis often start with such a lesion  
324 (37), which makes the site susceptible to bacterial attachment. Fibrillated Fn forms on the surface of  
325 platelets in the early stages of wound healing (38), and perhaps the abundance of fibrillated Fn plays  
326 role in the elevated infection risk. We show that Embp is required for attachment of *S. epidermidis*  
327 under high flow (Figure 5), pointing to a role for Embp in attachment of *S. epidermidis* e.g. to  
328 cardiovascular grafts. Future research in animal models will determine Embp's role in host and  
329 implant colonization in the cardiovascular system.

330

## 331 **MATERIALS AND METHODS**

### 332 **Bacterial strains**

333 *S. epidermidis* 1585 WT is a clinical isolate obtained from Rohde lab in UKE, Hamburg. *S.*  
334 *epidermidis* 1585Pxyl/tet *embp* (Embp overexpressed), *S. epidermidis*  $\Delta embp$ , *S. carnosus* TM300 x  
335 pEmbp\_5F (expressing 5 F-repeats) and *S. carnosus* TM300 x pEmbp\_9FG (expressing 9 FG-  
336 repeats) were generated previously in the Rhode lab (10).

337

### 338 **Immunofluorescence of Embp fusion protein**

339 Expression of Embp fusion protein in a non-adhesive surrogate host was critical for studying the  
340 interaction of Embp without interfering interactions from other adhesive proteins on the surface of *S.*  
341 *epidermidis*. We therefore started out by confirming the presence of Embp fragments on the surface

342 of the surrogate host. *S. carnosus* TM300 WT, and *S. carnosus* TM300 x pEmbp\_5F were grown  
343 overnight in brain heart infusion (BHI) broth with 10  $\mu\text{g ml}^{-1}$  chloramphenicol (Sigma-Aldrich,  
344 Germany). Expression of Embp fragments in the mutant strains was induced with 200  $\text{ng ml}^{-1}$   
345 anhydrotetracycline (AHT) after diluting the culture 100 times in BHI. Cells were grown for 6 hours  
346 at 37°C in a shaking incubator with 180 rpm until the 600 nm optical density (OD<sub>600</sub>) reached  
347 approximately 1. Cells were harvested by centrifugation (4000  $\times g$  or 10 minutes) and resuspended  
348 in phosphate buffered saline (PBS). A droplet of the resuspended cells was placed on a SuperFrost  
349 Ultra Plus slides (Invitrogen, USA) for 45 minutes to allow the bacteria to adsorb. After washing off  
350 unbound cells, the bacteria were fixed with 4% paraformaldehyde for 30 minutes at room temperature  
351 and washed twice with PBS. Samples were blocked with 5% goat serum (Invitrogen, USA) for 45  
352 minutes, washed, incubated with anti-Embp2588 IgG antibodies (39) diluted 1:200 in blocking buffer  
353 at room temperature for 1 hour, washed three times, and then incubated with the secondary antibody  
354 (Anti-rabbit IgG conjugated with Alexa Fluor 635, Invitrogen, USA) diluted 1:300 in blocking buffer  
355 for 1 hour at room temperature. Cells were then washed three times and stained with 10  $\mu\text{M}$  SYTO 9  
356 (Invitrogen, USA) in PBS for 10 minutes, washed 3 times, and visualized by confocal laser scanning  
357 microscopy (CLSM) (LSM700, Zeiss, Germany) using 488 excitation for SYTO 9, and 639 nm  
358 excitation Alexa Fluor 635 conjugated antibody, and a 63x Plan-Apochromat N/A 1.4 objective.

### 359 **Interaction of Embp with soluble Fn**

360 We first investigated if *S. epidermidis* or a surrogate host expressing Embp fragments interacted with  
361 soluble Fn in its globular conformation. *S. aureus* 29213 WT (positive control for soluble Fn binding)  
362 *S. epidermidis* 1585 WT, *S. epidermidis* 1585 $\Delta embp$  (Embp knockout), were grown in BHI without  
363 antibiotics. *S. epidermidis* 1585Pxyl/tet *embp* (Embp overexpressed) was grown in BHI with 5  $\mu\text{g ml}^{-1}$   
364 erythromycin, *S. carnosus* TM300 x pEmbp\_5F (5 F-repeats) and *S. carnosus* TM300 x  
365 pEmbp\_9FG (9 FG-repeats) were grown in BHI with 10  $\mu\text{g ml}^{-1}$  chloramphenicol. Expression of  
366 Embp, F- and FG-repeats in the mutant strains was induced with 200  $\text{ng ml}^{-1}$  anhydrotetracycline  
367 (AHT) after diluting the culture 100 times in BHI. Cells were grown for 6 hours at 37°C in a shaking  
368 incubator with 180 rpm until reaching OD<sub>600</sub> of approximately 1. Cells were harvested by  
369 centrifugation (4000 g for 10 minutes) and resuspended in PBS. A droplet of the resuspended cells  
370 was immobilized on a SuperFrost Ultra Plus slides (Invitrogen, USA) for 45 minutes to allow the  
371 bacteria to adsorb. The unabsorbed cells were removed by washing with PBS, and the adsorbed cells  
372 were then blocked with 3% BSA for 45 minutes. Cells were then incubated with 100  $\mu\text{g ml}^{-1}$  Fn in  
373 PBS (Sigma-Aldrich, F0895) for 60 minutes at room temperature. The unbound Fn was removed by  
374 washing three times with PBS. The samples were then fixed with 4% paraformaldehyde for 30  
375 minutes at room temperature. Immunolabeling was then performed as described above, Anti-Fn

376 mouse IgG (Sigma-Aldrich) diluted 1:100 in blocking buffer and the secondary antibody (Anti-mouse  
377 IgG conjugated with Alexa 635, Goat IgG - Invitrogen) diluted 1:300 in blocking buffer. Cells were  
378 stained and prepared for imaging as described above.

### 379 **Preparation of polymer-coated surfaces**

380 Quantification of interaction forces between Embp and Fn in its globular or fibrillated form would  
381 require that Fn was immobilized to a surface. We used a previously published model system (20, 40)  
382 to generate Fn-coated surfaces that displayed Fn in these two conformations, while the  
383 physicochemical properties of the underlying surface was very similar, namely PEA and PMA.  
384 Polymers of ethyl acrylate and methyl acrylate were synthesized from their monomers (99% pure,  
385 Sigma-Aldrich, Germany) using radical polymerization. Benzoin (98% pure, Sigma-Aldrich,  
386 Germany) was used as a photoinitiator with 1 wt % for PEA and 0.35 wt % for PMA. The  
387 polymerization reaction was allowed in Schlenk flasks exposing to ultraviolet light (portable UV  
388 lamp with light of 390- 410nm) up to the limited conversion of monomers (2 hours). Polymers were  
389 then dried to constant weight in a vacuum oven at 60 °C for 12 hours. Both polymers were solubilized  
390 in toluene (99.8% pure, Sigma-Aldrich) to concentration of 6% w/v for PEA and 2.5% w/v for PMA.  
391 2 hours sonication in an ultrasonic bath at room temperature was used to make the polymer soluble.  
392 Glass slides (76 x 26 mm, Hounisen) were cleaned with sonication in ultrasonic bath for 15 minutes  
393 in Acetone, Ethanol, and Milli-Q water respectively, and then dried under nitrogen flow. A thin film  
394 of polymer solution was coated on clean slides using spin-coater (Laurell Technologies) with  
395 acceleration and velocity of 1000 rpm for 30 seconds. The spin-coated films were degassed in a  
396 desiccator for 30 minutes under vacuum and then put in a vacuum oven at 60 °C for 2 hours to remove  
397 toluene.

### 398 **Fn adsorption to PMA and PEA**

399 A hydrophobic marker (PAP pen – Sigma-Aldrich) was used to draw a small circle (around 0.5 cm  
400 square area) on the spin-coated slides. Fn from human plasma (Sigma-Aldrich, F0895) was dissolved  
401 in PBS at concentration of 20  $\mu\text{g ml}^{-1}$  and 100  $\mu\text{l}$  sample was adsorbed on each slide for 1 hour at  
402 room temperature.

### 403 **Atomic force microscopy for imaging of Fn adsorbed to PMA and PEA**

404 Experiments were conducted on three replicate samples with JPK Nanowizard IV (JPK, Germany)  
405 using HQ: CSC38/No Al (Mikromasch, USA) and TR400PSA (Asylum Research, USA) cantilevers.  
406 We used the fluid mode of operation to visualize Fn adsorbed to PEA and PMA without introducing  
407 artifacts from sample drying. The operating environment was controlled in a closed liquid chamber  
408 at 21°C with minimal evaporation. The operation parameters were set to optimize resolution with  
409 minimum possible damage or artifact from contaminations on the tip. Typically, scans were started  
410 with a large scan area of minimum 10 x 10  $\mu\text{m}^2$  with a rather low scan resolution of 64 x 64 pixels

411 and a high scan rate  $> 1$  Hz. Once an area of interest was identified, a higher resolution image 256 x  
412 256 or 512 x 512 pixels of a smaller scan area was acquired at lower scan speeds ( $< 1$  Hz). The  
413 acquired data was processed using Gwyddion open software (<http://gwyddion.net/>) for necessary  
414 corrections of tilt etc.

#### 415 **XPS of Fn adsorbed to PEA and PMA**

416 A 100  $\mu\text{l}$  of Fn ( $20 \mu\text{g ml}^{-1}$ ) was adsorbed on a polymer spin-coated  $1 \times 1$  cm glass slides (these slides  
417 were cut manually in the chemistry lab workshop) for 1 hour, and samples were then washed three  
418 times with Milli-Q water and dried under  $\text{N}_2$  flow. The chemical composition of the adsorbed layer  
419 was analyzed with a Kratos AXIS Ultra DLD instrument equipped with a monochromatic Al  $\text{K}\alpha$  X-  
420 ray source ( $h\nu = 1486.6$  eV). All spectra were collected in electrostatic mode at a take-off angle of  
421  $55^\circ$  (angle between the sample surface plane and the axis of the analyzer lens). The spectra were  
422 collected at new spots on the sample ( $n=3$ , 1 replicate) and were charge corrected to the  $\text{C}_{1s}$  aliphatic  
423 carbon binding energy at 285.0 eV, and a linear background was subtracted for all peak areas  
424 quantifications. Analyzer pass energy of 160 eV was used for compositional survey scans of  $\text{C}_{1s}$ ,  $\text{O}_{1s}$ ,  
425  $\text{N}_{1s}$ ,  $\text{Na}_{1s}$ ,  $\text{Si}_{2p}$ ,  $\text{Cl}_{2p}$ ,  $\text{P}_{2p}$ , and  $\text{K}_{2p}$ . High-resolution scans of  $\text{C}_{1s}$  and  $\text{N}_{1s}$  elements were collected at an  
426 analyzer pass energy of 20 eV. Compositions and fits of the high-resolution scans were produced in  
427 CasaXPS. The data is presented in a table as an average and standard deviation of the three sample  
428 spots.

429

430

#### 431 **FTIR analysis of Fn adsorbed to PEA and PMA**

432 FTIR measurements were performed on a Bruker Vertex v70 with 128 scans per spectrum and a 7  
433 mm diameter beam spot. The concentration of Fn ( $20 \mu\text{gml}^{-1}$ ) results in very small IR absorbances of  
434 the polymer layers, so therefore, the spectra of stacks of 8 coated  $\text{CaF}_2$  windows were measured  
435 simultaneously. For this, 8 spin coated  $\text{CaF}_2$  window surfaces with PMA and PEA were incubated  
436 for one hour with the  $20 \mu\text{gml}^{-1}$  Fn solution in PBS prepared in  $\text{D}_2\text{O}$  (d-PBS hereafter), after rinsing  
437 the surfaces with d-PBS and placed 4 sets of windows (spaced by 25  $\mu\text{m}$  Teflon spacers that were  
438 filled by d-PBS, with the polymer and protein-coated sides submerged in the d-PBS) in a custom-  
439 made IR cell. The incubated sample spectra were background-corrected by subtracting the spectra of  
440 the same neat d-PBS loaded windows. Before subtraction, we (i) corrected for small differences in  
441 the overall transmission of the protein and background samples (due to e.g. small differences in the  
442 amount of scattering of the IR beam, which can become significant with 8 consecutive windows) by  
443 subtracting the absorption at  $7500 \text{ cm}^{-1}$ , and (ii) corrected for small differences in the exact water-  
444 layer thickness by scaling the spectra using a spectrally isolated absorption band of the  $\text{D}_2\text{O}$  (the  $\nu_1$   
445 +  $\nu_2$  combination band of the solvent's OD-bending and stretching mode1 at  $3840 \text{ cm}^{-1}$ ) to determine

446 the scaling factor. But there is no reason to assume that the water and polymer layers thicknesses are  
447 related. Therefore, the resulting background-corrected amide-I ( $1600\text{-}1700\text{ cm}^{-1}$ ) PEA+Fn spectrum  
448 (Figure 1) still contains a tail of the  $1733\text{ cm}^{-1}$  ester peak, which is absent in the resulting PMA+Fn  
449 spectrum. This is (i) because there is approximately 6 times more PEA present than PMA (as indicated  
450 by a least-square fit that minimized the total intensity of the subtraction of the PMA from the PEA  
451 background spectra in the  $1700\text{-}1760\text{ cm}^{-1}$  region, see supplementary materials Figure S6, S7 and the  
452 accompanying supplementary materials text), and (ii) because the Fn incubation results in a slight  
453 loss of polymer, which is impossible to compensate for well by subtraction of the polymer spectra,  
454 because the  $1733\text{ cm}^{-1}$  ester peak shape is affected by the presence of the protein (see figure S6(d)).  
455 The broadening of this peak by Fn incubation is probably because the ester groups in contact with the  
456 protein are slightly shifted with respect of the more buried ester groups that are not changed by the  
457 protein adsorption, resulting in two subpeaks that are slightly offset in frequency. Even though the  
458 PMA layer appears to be thinner and/or less dense, it will probably still be composed of many  
459 monolayers (as indicated by the XPS measurements), so this difference in thickness is not expected  
460 to affect the protein's interfacial behavior.

461

462

### 463 **Quantification of bacterial attachment under flow**

464 Ibidi sticky-slide VI 0.4 chambers (Ibidi, Germany) were glued to polymer-coated glass by using an  
465 equivalent mixture of silicon (DOWSIL 732 - Dow corning) and UV activating glue (Loctite 3106  
466 Light Cure Adhesive). After flow cell assembly,  $50\text{ }\mu\text{l}$  of Fn ( $20\text{ }\mu\text{g ml}^{-1}$ ) dissolved in PBS was  
467 injected to the channel of a flow cell and allow to adsorb statically for 1 hour at room temperature.  
468 The unbound Fn was removed by a flow of PBS ( $6\text{ ml hour}^{-1}$ ) using a syringe pump (Harvard  
469 Apparatus, USA) for 15 minutes. Bacterial cells were subcultured from an overnight culture and  
470 grown for 6 hours at  $37^{\circ}\text{C}$  and 180 rpm, harvested by centrifugation ( $4000\text{ g}$  for 10 minutes), and  
471 resuspended in PBS to an  $\text{OD}_{600}$  of 0.1. The cell suspension was flowed through the flow cell chamber  
472 at  $3\text{ ml hour}^{-1}$  for 2 hours at room temperature. The unbound cells were washed with PBS at  $9\text{ ml}$   
473  $\text{hour}^{-1}$  for 30 minutes. Attached bacteria were visualized by brightfield microscopy (Zeiss Axiovert  
474 A100, 20x objective) and counted. A minimum of 5 images were acquired per replicate, and a  
475 minimum of 500 cells were counted per replicate.

476 The first experiment compared attachment of *S. carnosus* TM300 x pEmbp\_5F and *S. carnosus*  
477 TM300 x pEmbp\_9FG to PEA and PMA surfaces with and without Fn to investigate if the Fn-binding  
478 domains of Embp interacted selectively with the fibrillated form of Fn. The second experiment  
479 investigated which domain of Fn Embo interacted with. Previous studies had shown that that Embp  
480 binds to the F3  $12^{\text{th}}$ - $14^{\text{th}}$  domain of Fn (11), however, this experiment was only performed with

481 recombinant fragments of Fn and not the full length protein. We therefore investigated the role of this  
482 Fn domain in the attachment of bacteria via Embp. Flow-cell experiments were carried out as  
483 described above, comparing attachment via F og FG to fibrillated Fn directly or after blocking for F3  
484 12<sup>th</sup>-14<sup>th</sup> domain withn IgG antibodies (Anti-Fn, sc-18827, Santa Cruz biotech). As a control,  
485 fibrillated Fn was blocked with IgG antibodies specific for another Fn domain (F3 5<sup>th</sup> domain). The  
486 unbound antibodies were removed with PBS (6 ml hour<sup>-1</sup>, 15 minutes) before investigating bacterial  
487 attachment as described above.

488 The final experiment addressing attachment under flow compared the attachment of *S. epidermidis*  
489 1585 P<sub>xyl</sub>/tet *embp* and *S. epidermidis*  $\Delta$ *embp*. The strains were inoculated from single colonies into  
490 BHI broth (amended with 5  $\mu$ g ml<sup>-1</sup> erythromycin and 200 ng ml<sup>-1</sup> anhydrotetracycline (ATC) for the  
491 P<sub>xyl</sub>/tet *embp* strain) and grown overnight at 37°C, 180 rpm, harvested by centrifugation, and  
492 resuspended in PBS to OD<sub>600</sub> = 0.3, transferred to the syringe pump and passed through the flow-  
493 cells at either 1 mL min<sup>-1</sup> or 18 ml min<sup>-1</sup> flowrate for 1 h followed by a 30 min PBS washing step of  
494 6 ml min<sup>-1</sup> or 36 ml min<sup>-1</sup>, respectively. Attached cells were imaged by brightfield microscopy and  
495 by CLSM after staining with 20x SYBR Green II (Sigma Aldrich).

#### 496 **Hydrodynamic radius**

497 *S. epidermidis* 1585 P<sub>xyl</sub>/tet *embp* and *S. epidermidis*  $\Delta$ *embp* were prepared as described above,  
498 transferred to cuvettes and analysed by dynamic light scattering (DLS) (Folded Capillary Zeta Cell,  
499 malvern US). Measurements of surface charge and cell diameter was carried out using Zetasizer Nano  
500 (Malvern Panalytical).

#### 501 **Single-cell force spectroscopy**

502 Single-cell force spectroscopy (SCFS) measurements were conducted on Fn adsorbed in its globular  
503 conformation to PMA or its fibrillated conformation to PEA. For SCFS measurement, colloidal  
504 probes with 10  $\mu$ m glass beads (SHOCON-BSG-B-5, Applied NanoStructures Inc., USA) were  
505 selected and coated by polymerizing a dopamine solution of 4 mg ml<sup>-1</sup> dopamine hydrochloride (99%,  
506 Sigma-Aldrich, H8502) in 10 mM Tris-HCl buffer at pH 8.5, and then calibrated *in situ* for single-  
507 cell attachment. *S. carnosus* TM300 expressing 5 F- and 9 FG-repeats were subcultured from  
508 overnight cultures and incubated for 6 hours in fresh media, harvested and resuspended in PBS as  
509 described above. A 100  $\mu$ l drop of this solution was placed on a glass slide and incubated for 10  
510 minutes, after which the unadsorbed bacteria were removed by rinsing with PBS. A colloidal probe  
511 was immersed and positioned on top of a single cell with the help of inverted optical microscope. The  
512 probe was made to contact a single cell for 5 minutes then retracted after the cell attachment. Once a  
513 cell was picked up (confirmed by optical microscopy), the substrate was changed to Fn coated  
514 surfaces and SCFS was executed. The acquired force-distance plots were processed using the

515 Nanowizard's (JPK, Germany) own processing software. Experiments were conducted on two  
516 replicate samples.

### 517 **Cloning and purification of F- and FG-repeats**

518 Genomic DNA was extracted from *S. epidermidis* 1585 WT strain using the Qiagen DNA kit  
519 (Qiagen, Hilden, Germany) by following the instructions of the manufacturer. The only exception  
520 made in the kit protocol was that cells were lysed with 15 U of lysostaphin, which was added to buffer  
521 P1. The nucleotide sequence of one, four, and fifteen repeats of the FG-repeats were amplified from  
522 genomic DNA using primers (Table S2) with Phusion High-Fidelity PCR Kit (NEB - E0553S). The  
523 PCR products were purified with GenElute PCR Clean-Up Kit (Sigma-Aldrich NA1020). The  
524 expression vector pET302/NT-His was digested with EcoR1 restriction enzyme (NEB R0101S) and  
525 run on a 1.5 % agarose gel. The digested vector was purified from the gel using the GenElute Gel  
526 Extraction Kit (Sigma-Aldrich NA1111). The purified PCR product of each recombinant Embp  
527 (rEmbp) was ligated with the digested vector in a ratio of 3:1 using the Gibson assembly ligation  
528 matrix mix (NEB E5510S). Each ligation reaction was incubated for 1 hour at 50 °C. The ligated  
529 products were transformed into the chemically competent *E. coli* strain (Top10). The colony PCR  
530 was performed with REDTaq ReadyMix (Sigma-Aldrich R2523) using the T7 promoter primer as  
531 forward and the T7 terminator primer as the reverse. Cells from each selected colony were grown  
532 overnight in LB with 100 µg ml<sup>-1</sup> ampicillin, and a plasmid miniprep was prepared using GeneJET  
533 Plasmid Miniprep Kit (Thermo Scientific K0702). Plasmids were sequenced with both T7 promoter  
534 and terminator primers by the Eurofins A/S (Hamburg, Germany). The plasmid of each Embp  
535 construct was transformed into an expression system (chemically competent *E. coli*, BL21-DE3). A  
536 single colony of the transformants was used to inoculate 2 L of LB with 100 µg ml<sup>-1</sup> ampicillin until  
537 the OD<sub>600</sub> of 0.6. For the overexpression, cells were induced with 1M IPTG, and incubated for 16  
538 hours on 28 °C in shaking incubator at 180 rpm. Cells were harvested and lysed in binding buffer  
539 with sonication (30% amplitude, 15 seconds off, 15 seconds on) for 3 minutes on ice. After  
540 centrifugation, the supernatant was filtered with a 0.22 µm syringe filter and run on a Nickel-  
541 Nitrilotriacetic Acid (Ni-NTA) column using ÄKTA Purifier-10 purification system. The column was  
542 washed with 5 - 8 column volumes, and the fusion proteins Embp was then eluted in fractions using  
543 elution buffer. Fractions of each rEmbp were pooled, concentrated with Amicon Ultra centrifugal  
544 filter tubes with a cut-off 3 kDa (Millipore Sigma UFC9003). Proteins were further purified with  
545 (HiTrap Q FF) column by anion exchange (IEX) chromatography using IEX binding and elution  
546 buffer, followed by size exclusion chromatography (SEC) with column (Superdex 200 Increase  
547 10/300 GL) using MES buffer on ÄKTA Purifier-10 purification system. After each column, the  
548 elution fractions were run on SDS-PAGE to check the purification quality. Buffers used for rEmbp  
549 purification are listed in Table S3.



550

## 551 **Single-molecule force spectroscopy**

552 Single-molecule force spectroscopy (SMFS) measurements, similar to SCFS, conducted on Fn  
553 adsorbed to either PEA and PMA. For the SMFS experiments, the probes were prepared by attaching  
554 rEmbp fragments of various lengths with the use of His<sub>6</sub>-NTA interaction. The procedure was similar  
555 to that of Obataya *et al* (41). In short, silicon probes were cleaned with ozone, and UV light then kept  
556 in one to one isopropyl alcohol and ethanol mixture overnight. Tips were rinsed in deionized water  
557 and air-dried, after which they were functionalized with 2% (3-mercaptopropyl) trimethoxysilane in  
558 EtOH for 30 minutes. Probes were then exposed to Maleimide-C3-NTA in 50% DMF/100 mM Tris-  
559 HCl (pH7.5 ± 0.1) overnight. 10 mM NiCl<sub>2</sub> was used to chelate the NTA groups on the tip, which  
560 was then dipped in bovine serum albumin (1 mg ml<sup>-1</sup> in PBS) to passivate the surface. The attachment  
561 of 6X His-tagged rEmbp fragments with 1, 4 or 15 repeating units of Fn binding repeats was  
562 completed by 1 hour incubation of respective samples at room temperature. After a probe for each  
563 repeating unit were prepared, force-distance curves were collected on three replicate samples and  
564 processed, as mentioned above.

565

566

## 567 **ACKNOWLEDGEMENTS**

568 This work was funded by the Carlsberg Foundation, Grant number CF16-0342. Cecilie Siem Bach-  
569 Nielsen is gratefully acknowledged for quantification of *S. epidermidis* attachment under high and  
570 low flow rates. TWG and SJR thank the Lundbeck Foundation for postdoc fellowships.

571

## 572 **REFERENCES**

573

- 574 1. C. R. Arciola, D. Campoccia, L. Montanaro, Implant infections: Adhesion, biofilm formation  
575 and immune evasion. *Nature Reviews Microbiology* **16**, 397-409 (2018).
- 576 2. L. de Vor, S. H. M. Rooijackers, J. A. G. van Strijp, Staphylococci evade the innate immune  
577 response by disarming neutrophils and forming biofilms. *FEBS Letters* **594**, 2556-2569  
578 (2020).
- 579 3. S. E. Rowe, J. E. Beam, B. P. Conlon, Recalcitrant Staphylococcus aureus Infections:  
580 Obstacles and Solutions. *Infection and immunity* **89**, (2021).
- 581 4. W. F. Oliveira *et al.*, Staphylococcus aureus and Staphylococcus epidermidis infections on  
582 implants. *Journal of Hospital Infection* **98**, 111-117 (2018).
- 583 5. J. D. Patel, M. Ebert, R. Ward, J. M. Anderson, S. epidermidis biofilm formation: Effects of  
584 biomaterial surface chemistry and serum proteins. *Journal of Biomedical Materials Research*  
585 *- Part A* **80**, 742-751 (2007).
- 586 6. P. François, P. Vaudaux, P. D. Lew, Role of plasma and extracellular matrix proteins in the  
587 physiopathology of foreign body infections. *Annals of Vascular Surgery* **12**, 34-40 (1998).
- 588 7. T. J. Foster, Surface Proteins of Staphylococcus epidermidis. *Frontiers in Microbiology* **11**,  
589 (2020).

- 590 8. H. Rohde *et al.*, Polysaccharide intercellular adhesin or protein factors in biofilm  
591 accumulation of *Staphylococcus epidermidis* and *Staphylococcus aureus* isolated from  
592 prosthetic hip and knee joint infections. *Biomaterials* **28**, 1711-1720 (2007).
- 593 9. V. C. Salgueiro, N. L. P. Iorio, M. C. Ferreira, R. C. Chamon, K. R. N. Dos Santos, Methicillin  
594 resistance and virulence genes in invasive and nasal *Staphylococcus epidermidis* isolates from  
595 neonates. *BMC Microbiology* **17**, (2017).
- 596 10. H. Büttner *et al.*, A giant extracellular matrix binding protein of *staphylococcus epidermidis*  
597 binds surface-immobilized fibronectin via a novel mechanism. *mBio* **11**, 1-9 (2020).
- 598 11. M. Christner *et al.*, The giant extracellular matrix-binding protein of *Staphylococcus*  
599 *epidermidis* mediates biofilm accumulation and attachment to fibronectin. *Molecular*  
600 *Microbiology* **75**, 187-207 (2010).
- 601 12. W. Dolores, R. Christian, N. Harald, P. Hildegunde, W. Georg, Cellular and molecular  
602 composition of fibrous capsules formed around silicone breast implants with special focus on  
603 local immune reactions. *Journal of Autoimmunity* **23**, 81-91 (2004).
- 604 13. M. Rocco, O. Aresu, L. Zardi, Conformational state of circulating human plasma fibronectin.  
605 *FEBS Letters* **178**, 327-330 (1984).
- 606 14. G. Baneyx, L. Baugh, V. Vogel, Coexisting conformations of fibronectin in cell culture  
607 imaged using fluorescence resonance energy transfer. *Proceedings of the National Academy*  
608 *of Sciences of the United States of America* **98**, 14464-14468 (2001).
- 609 15. C. Zhong *et al.*, Rho-mediated contractility exposes a cryptic site in fibronectin and induces  
610 fibronectin matrix assembly. *Journal of Cell Biology* **141**, 539-551 (1998).
- 611 16. V. Llopis-Hernández *et al.*, Material-driven fibronectin assembly for high-efficiency  
612 presentation of growth factors. *Science Advances* **2**, (2016).
- 613 17. P. Rico *et al.*, Substrate-induced assembly of fibronectin into networks: Influence of surface  
614 chemistry and effect on osteoblast adhesion. *Tissue Engineering - Part A* **15**, 3271-3281  
615 (2009).
- 616 18. M. Salmerón-Sánchez *et al.*, Role of material-driven fibronectin fibrillogenesis in cell  
617 differentiation. *Biomaterials* **32**, 2099-2105 (2011).
- 618 19. M. K. Bieniek, V. Llopis-Hernandez, K. Douglas, M. Salmeron-Sanchez, C. D. Lorenz, Minor  
619 Chemistry Changes Alter Surface Hydration to Control Fibronectin Adsorption and Assembly  
620 into Nanofibrils. *Advanced Theory and Simulations* **2**, (2019).
- 621 20. N. B. Guerra *et al.*, Subtle variations in polymer chemistry modulate substrate stiffness and  
622 fibronectin activity. *Soft Matter* **6**, 4748-4755 (2010).
- 623 21. A. Barth, C. Zscherp, What vibrations tell us about proteins. *Quarterly Reviews of Biophysics*  
624 **35**, 369-430 (2002).
- 625 22. L. Kar *et al.*, 1H NMR-based determination of the three-dimensional structure of the human  
626 plasma fibronectin fragment containing inter-chain disulfide bonds. *Journal of Biological*  
627 *Chemistry* **268**, 8580-8589 (1993).
- 628 23. J. R. Potts, I. D. Campbell, Structure and function of fibronectin modules. *Matrix Biology* **15**,  
629 313-320 (1996).
- 630 24. K. J. Johnson, H. Sage, G. Briscoe, H. P. Erickson, The compact conformation of fibronectin  
631 is determined by intramolecular ionic interactions. *Journal of Biological Chemistry* **274**,  
632 15473-15479 (1999).
- 633 25. L. M. Maurer, W. Ma, D. F. Mosher, Dynamic structure of plasma fibronectin. *Critical*  
634 *Reviews in Biochemistry and Molecular Biology* **51**, 213-227 (2016).
- 635 26. E. Klotzsch *et al.*, Fibronectin forms the most extensible biological fibers displaying  
636 switchable force-exposed cryptic binding sites. *Proceedings of the National Academy of*  
637 *Sciences of the United States of America* **106**, 18267-18272 (2009).
- 638 27. C. R. Arciola *et al.*, *Staphylococcus epidermidis*-fibronectin binding and its inhibition by  
639 heparin. *Biomaterials* **24**, 3013-3019 (2003).
- 640 28. A. Both *et al.*, Distinct clonal lineages and within-host diversification shape invasive  
641 *staphylococcus epidermidis* populations. *PLoS Pathogens* **17**, (2021).

- 642 29. A. E. Paharik, A. R. Horswill, in *Virulence Mechanisms of Bacterial Pathogens*. (2016), pp.  
643 529-566.
- 644 30. R. J. Williams, B. Henderson, L. J. Sharp, S. P. Nair, Identification of a fibronectin-binding  
645 protein from *Staphylococcus epidermidis*. *Infection and Immunity* **70**, 6805-6810 (2002).
- 646 31. I. Maxe, C. Ryden, T. Wadstrom, K. Rubin, Specific attachment of *Staphylococcus aureus* to  
647 immobilized fibronectin. *Infection and Immunity* **54**, 695-704 (1986).
- 648 32. M. Paulsson, I. Gouda, O. Larm, Å. Ljungh, Adherence of coagulase-negative staphylococci  
649 to heparin and other glycosaminoglycans immobilized on polymer surfaces. *Journal of*  
650 *Biomedical Materials Research* **28**, 311-317 (1994).
- 651 33. M. J. Pestrak *et al.*, Investigation of synovial fluid induced *Staphylococcus aureus* aggregate  
652 development and its impact on surface attachment and biofilm formation. *PLoS ONE* **15**,  
653 (2020).
- 654 34. Y. Tanaka *et al.*, A Helical String of Alternately Connected Three-Helix Bundles for the Cell  
655 Wall-Associated Adhesion Protein Ehb from *Staphylococcus aureus*. *Structure* **16**, 488-496  
656 (2008).
- 657 35. D. J. Müller, J. Helenius, D. Alsteens, Y. F. Dufrene, Force probing surfaces of living cells to  
658 molecular resolution. *Nature Chemical Biology* **5**, 383-390 (2009).
- 659 36. V. Post *et al.*, Comparative genomics study of *Staphylococcus epidermidis* isolates from  
660 orthopedic-device-related infections correlated with patient outcome. *Journal of Clinical*  
661 *Microbiology* **55**, 3089-3103 (2017).
- 662 37. J. M. Steckelberg, W. R. Wilson, Risk factors for infective endocarditis. *Infectious Disease*  
663 *Clinics of North America* **7**, 9-19 (1993).
- 664 38. W. S. To, K. S. Midwood, Plasma and cellular fibronectin: Distinct and independent functions  
665 during tissue repair. *Fibrogenesis and Tissue Repair* **4**, (2011).
- 666 39. M. Christner *et al.*, The giant extracellular matrix-binding protein of *Staphylococcus*  
667 *epidermidis* mediates biofilm accumulation and attachment to fibronectin. *Molecular*  
668 *microbiology* **75**, 187-207 (2010).
- 669 40. P. Rico *et al.*, Substrate-induced assembly of fibronectin into networks: influence of surface  
670 chemistry and effect on osteoblast adhesion. *Tissue Engineering Part A* **15**, 3271-3281 (2009).
- 671 41. I. Obataya, C. Nakamura, S. Han, N. Nakamura, J. Miyake, Direct insertion of proteins into a  
672 living cell using an atomic force microscope with a nanoneedle. *Nanobiotechnology* **1**, 347-  
673 352 (2005).
- 674
- 675

676  
677  
678

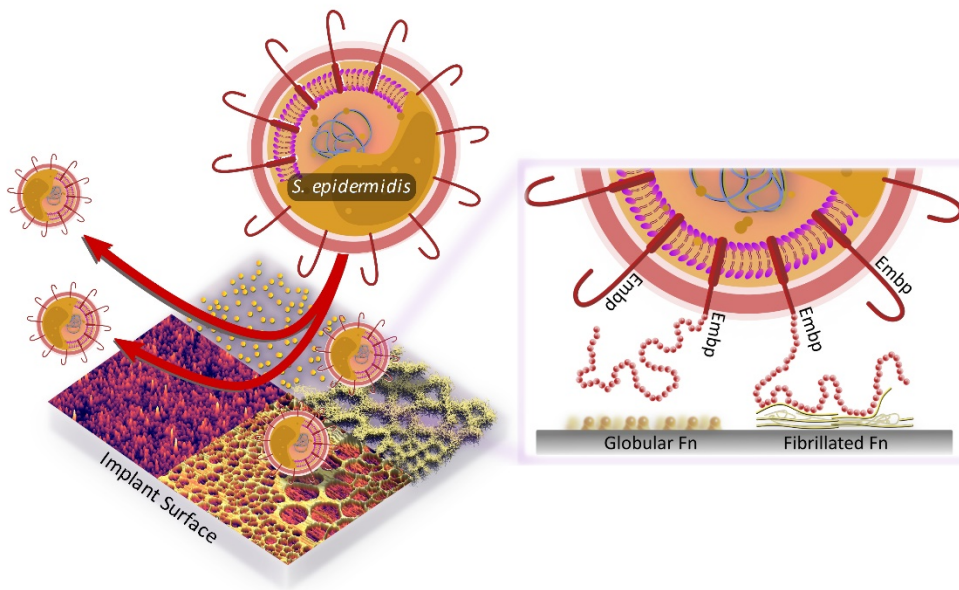

679  
680  
681  
682  
683  
684

**Graphical abstract:** Fibronectin exists in two different conformations in the body. It circulates in the bodily fluids in globular conformation, however, it become fibrillated once adsorbed to an implant surface. *S. epidermidis* possess a giant 1 MDa receptor known as Embp bind specifically to fibrillated Fn but not to the globular Fn.
